# Supplementary material for: Structural Characterization of β-Xylosidase XynB2 from Geobacillus stearothermophilus CECT43: A Member of the Glycoside Hydrolase Family GH52
Source: MDPI journal article supplement (doi:10.3390/cryst14010018), 2023-12-24
Supplement: s1 [file s1]

**Structural characterization of  $\beta$ -xylosidase XynB2 from  
*Geobacillus stearothermophilus* CECT43, a member of the glycoside hydrolase  
family GH52**

Jose Antonio Gavira<sup>a</sup>, Lellys M. Contreras<sup>b</sup>, Hassan Mohamad Alshamaa<sup>a,c</sup>, Josefa María Clemente-Jiménez<sup>b</sup>, Felipe Rodríguez-Vico<sup>b</sup>, Francisco Javier Las Heras-Vázquez<sup>b</sup> and Sergio Martínez-Rodríguez<sup>a,c,\*</sup>.

<sup>a</sup>Laboratorio de Estudios Cristalográficos. IACT. CSIC-Universidad de Granada, Granada, Spain. <sup>b</sup>Dpto. Química y Física, Universidad de Almería, Almería, Spain. <sup>c</sup>Dpto. Bioquímica y Biología Molecular III e Inmunología, Universidad de Granada, Granada, Spain.

**\* Corresponding author:**

Sergio Martínez Rodríguez. Dpto. Bioquímica y Biología Molecular III e Inmunología, Universidad de Granada. Facultad de Medicina. Universidad de Granada. Avda. de la Investigación nº 11. 18071, Granada, Spain. e-mail: sergio@ugr.es

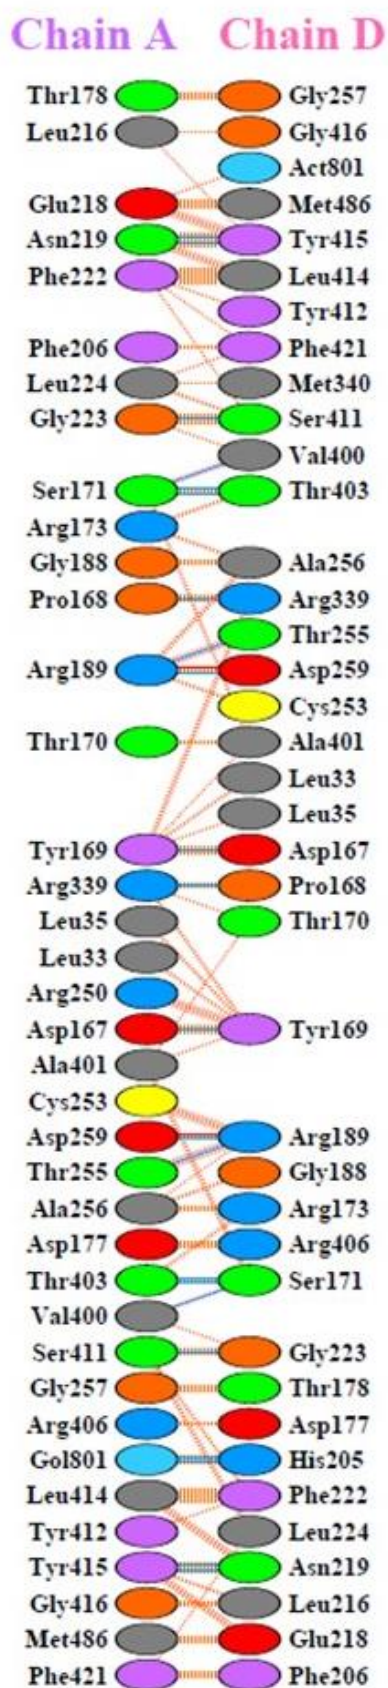

Figure S1. Contacts found in the Gst43XynB2 interface, calculated by PDBsum server. Salt bridges, hydrogen bonds and non-bonded contacts appear in red, blue and orange, respectively. Gol: glycerol. Act: acetate.

*Gst43xynB2*

1 10 20 30 40 50 TT β4

β1 β2 β3

*Gst43xynB2* ... MPTNLFFNAHSPVGAFASTTIGFPGKSGGLDLELARPPRONVITGVESPHPEGLYH  
*GstT6XynB2* ... MATNLFFNAHSPVGAFASTTIGFPGKSGGLDLELARPPRONVITGVESPHPEGLYH  
*GthXynB2* MASMPKMMFFNAHSPVGAFASTTIGFPGKSGGLDLELARPPRONVITGVASLSQPGMYE  
*Geost1A* ... MPTNLFFNAHSPVGAFASTTIGFPGKSGGLDLELARPPRONVITGVESPHPEGLYH  
*Geost21* ... MPTNLFFNAHSPVGAFASTTIGFPGKSGGLDLELARPPRONVITGVESLHESGLYH  
*Geost22* ... MPTNLFFNAHSPVGAFASTTIGFPGKSGGLDLELARPPRONVITGVESPHPEGLYH  
*Aercav* .MSTFKSIFYNAAHAPIGAFASTTIGYKGAKGGLGLELGPADQNVYIGLQSR.DGENYQ  
*PaeDG22* ... MGRNDDFFNAHSPVGAFASTTIGFPGKSGGLDLELARPPRONVITGVESLHESGLYH  
*Halhal* .MFTPKNIFFNAHSPVGAFASTTIGFPGKSGGLDLELARPPRONVITGVESLHESGLYH  
*Thesac* ... .MISKSFYAAHSAFAGAFSTTIGKCGKGGGVVNDVRPPENNVITGVYKRD...GVVIS

\* \*

*Gst43xynB2*

60 70 80 90 100 TT β5 η1 β6 β7

*Gst43xynB2* ILPFAETAG EDESKRYDIENPDNPQ... KPNILIPFAKEETKREFCVAIDTWKA  
*GstT6XynB2* ILPFAETAG EDESKRYDIENPDNPQ... KPNILIPFAKEETKREFCVAIDTWKA  
*GthXynB2* VLPFFEA.GDESKRYDIENPDNPQ... KPNILIPFAKEETKREFCVAIDTWKA  
*Geost1A* ILPFAETAG EDESKRYDIENPDNPQ... KPNILIPFAKEETKREFCVAIDTWKA  
*Geost21* VLPFFEA.GDESKRYDIENPDNPQ... KPNILIPFAKEETKREFCVAIDTWKA  
*Geost22* ILPFAETAG EDESKRYDIENPDNPQ... KPNILIPFAKEETKREFCVAIDTWKA  
*Aercav* ALPFFEA.SQDESKRYDIENPDNPQ... KPNILIPFAKEETKREFCVAIDTWKA  
*PaeDG22* TLPFFEA.SQDESKRYDIENPDNPQ... KPNILIPFAKEETKREFCVAIDTWKA  
*Halhal* TLPFFEA.SQDESKRYDIENPDNPQ... KPNILIPFAKEETKREFCVAIDTWKA  
*Thesac* LLPFFEA.SQDESKRYDIENPDNPQ... KPNILIPFAKEETKREFCVAIDTWKA

\* \*

*Gst43xynB2*

110 120 130 140 150 160 TT β8 α1 β9 β10 TT

*Gst43xynB2* GDLTFTIYSPVKAVDPDETAEELKLALVPAVIVEMTIDNTNGTRTARRAFFGFEGTDPY  
*GstT6XynB2* GDLTFTIYSPVKAVDPDETAEELKLALVPAVIVEMTIDNTNGTRTARRAFFGFEGTDPY  
*GthXynB2* GDLTFTIYSPVKAVDPDETAEELKLALVPAVIVEMTIDNTNGTRTARRAFFGFEGTDPY  
*Geost1A* GDLTFTIYSPVKAVDPDETAEELKLALVPAVIVEMTIDNTNGTRTARRAFFGFEGTDPY  
*Geost21* GDLTFTIYSPVKAVDPDETAEELKLALVPAVIVEMTIDNTNGTRTARRAFFGFEGTDPY  
*Geost22* GDLTFTIYSPVKAVDPDETAEELKLALVPAVIVEMTIDNTNGTRTARRAFFGFEGTDPY  
*Aercav* GDLTFTIYSPVKAVDPDETAEELKLALVPAVIVEMTIDNTNGTRTARRAFFGFEGTDPY  
*PaeDG22* GDLTFTIYSPVKAVDPDETAEELKLALVPAVIVEMTIDNTNGTRTARRAFFGFEGTDPY  
*Halhal* GDLTFTIYSPVKAVDPDETAEELKLALVPAVIVEMTIDNTNGTRTARRAFFGFEGTDPY  
*Thesac* GDFKFSITIPFGYVKDPSVMNGDEKKLALAPVIFVQLTMDNTDSDKDAEMIFGFEGPKRI

\* \*

*Gst43xynB2*

170 180 190 200 210 220 TT β11 η2 β12 β13 β14 α2 η3 TT

*Gst43xynB2* TSMRRIDDT.CPQLRGVGGRIILGIA.SKDEGVRSAHFMSMEDILATLEEN.WTFGLGK  
*GstT6XynB2* TSMRRIDDT.CPQLRGVGGRIILGIA.SKDEGVRSAHFMSMEDILATLEEN.WTFGLGK  
*GthXynB2* TSMRRIDDT.CPQLRGVGGRIILGIA.SKDEGVRSAHFMSMEDILATLEEN.WTFGLGK  
*Geost1A* TSMRRIDDT.CPQLRGVGGRIILGIA.SKDEGVRSAHFMSMEDILATLEEN.WTFGLGK  
*Geost21* TSMRRIDDT.CPQLRGVGGRIILGIA.SKDEGVRSAHFMSMEDILATLEEN.WTFGLGK  
*Geost22* TSMRRIDDT.CPQLRGVGGRIILGIA.SKDEGVRSAHFMSMEDILATLEEN.WTFGLGK  
*Aercav* SAMRLIGGPEGGSITGVGGRIILGIA.SADDGLWPARGFTEKLLQEKHREN.LAFGLGS  
*PaeDG22* SAMRRIDDT.S.SLAGVGGRIILGIA.TDDKRVRSAHFMSMEDILATLEEN.WTFGLGK  
*Halhal* SSMRKIDDT.S.SVAGVGGRIILGIA.SNDPSVKSALHFSMEDILATLEEN.WTFGLGK  
*Thesac* LSELT...D.GKYLGGVYGRKYGFATIKSDVR...ELSRDLITLSWANDNYQNHGLGR

\* \*

*Gst43xynB2*

230 240 250 260 270 280 TT β15 β16 β17 η4 α3

*Gst43xynB2* VGALIVDVPAGEKKTYQFVCFYRGCVTAGMDASYFYTRFFHNIIEVGLYALEQAEVLK  
*GstT6XynB2* VGALIVDVPAGEKKTYQFVCFYRGCVTAGMDASYFYTRFFHNIIEVGLYALEQAEVLK  
*GthXynB2* VGALIVDVPAGEKKTYQFVCFYRGCVTAGMDASYFYTRFFHNIIEVGLYALEQAEVLK  
*Geost1A* VGALIVDVPAGEKKTYQFVCFYRGCVTAGMDASYFYTRFFHNIIEVGLYALEQAEVLK  
*Geost21* VGALIVDVPAGEKKTYQFVCFYRGCVTAGMDASYFYTRFFHNIIEVGLYALEQAEVLK  
*Geost22* VGALIVDVPAGEKKTYQFVCFYRGCVTAGMDASYFYTRFFHNIIEVGLYALEQAEVLK  
*Aercav* TAALLMEVPAGEKKTYQFVCFYRGCVTAGMDASYFYTRFFHNIIEVGLYALEQAEVLK  
*PaeDG22* VGALIVDVPAGEKKTYQFVCFYRGCVTAGMDASYFYTRFFHNIIEVGLYALEQAEVLK  
*Halhal* TGAIVVDVKPGEVKTIVRFVCFYRGCVTAGMDASYFYTRFFHNIIEVGLYALEQAEVLK  
*Thesac* APSLIFKVPRGEKRTYTVATATYQSGVITIGIDAEFYFYSVFEKSLSEVLISFGLDNQDYIL

\* \*

*Gst43xynB2*

290 300 310 320 330 340 TT α4 α5 β18 β19 η5

*Gst43xynB2* EQAFRSNE.LIEKEWLSDDQKFMMAHAIRSYGNTOLLE.HEGKPIWVVNEGEYRMNTFD  
*GstT6XynB2* EQAFRSNE.LIEKEWLSDDQKFMMAHAIRSYGNTOLLE.HEGKPIWVVNEGEYRMNTFD  
*GthXynB2* ERAFQSNQLIERDWLSDDQKFMMAHAIRSYGNTOLLE.QEGKPIWVVNEGEYRMNTFD  
*Geost1A* EQAFRSNE.LIEKEWLSDDQKFMMAHAIRSYGNTOLLE.HEGKPIWVVNEGEYRMNTFD  
*Geost21* EQAFRSNE.LIEKEWLSDDQKFMMAHAIRSYGNTOLLE.HEGKPIWVVNEGEYRMNTFD  
*Geost22* EQAFRSNE.LIEKEWLSDDQKFMMAHAIRSYGNTOLLE.HEGKPIWVVNEGEYRMNTFD  
*Aercav* ASCGEIEQRLGTAALTEDQS.FMLAHSIHSYASTOLL.DADGEPLWVVNEGEYRMNTFD  
*PaeDG22* ASAEERANGLENGLSEDQKFMMAHAIRSYGNTOLLE.LDGEPLWVVNEGEYRMNTFD  
*Halhal* AKAAESDELVANSKLSDDQKFMMAHAIRSYGNTOLLE.HEGKPIWVVNEGEYRMNTFD  
*Thesac* NLAKEERDELKKSGLNEVYRQFLLAHAHSYASTOLL.KRDLGMPLEWVVNEGEYRMNTFD



*Gst43xynB2*    α6    α7    β20    β21    β22    β23

350    360    370    380    390    400

*Gst43xynB2*    LTVDQLFFELKMNPTWKNVLDLYVERYSYEDRVRFPGDETEYPGGISFTTHDMGVANTFSS

*GstT6XynB2*    LTVDQLFFELKMNPTWKNVLDLYVERYSYEDRVRFPGDETEYPGGISFTTHDMGVANTFSS

*GthXynB2*    LTVDQLFFELKMNPTWKNVLDLYVERYSYEDRVRFPGDETEYPGGISFTTHDMGVANTFSS

*Geost1A*    LTVDQLFFELKMNPTWKNVLDLYVERYSYEDRVRFPGDETEYPGGISFTTHDMGVANTFSS

*Geost21*    LTVDQLFFELKMNPTWKNVLDLYVERYSYEDRVRFPGDETEYPGGISFTTHDMGVANTFSS

*Geost22*    LTVDQLFFELKMNPTWKNVLDLYVERYSYEDRVRFPGDETEYPGGISFTTHDMGVANTFSS

*Aercav*    LTADQLYFELALNPTWVRNELDWFKRYSYTDEVRFPGDETEYPGGISFTTHDMGVANTFSS

*PaedG22*    LTVDQLFFELKMNPTWKNVLDLYVERYSYEDRVRFPGDETEYPGGISFTTHDMGVANTFSS

*Halhal*    LTVDHLFFELKMNPTWKNVLDLYVERYSYEDRVRFPGDETEYPGGISFTTHDMGVANTFSS

*Thesac*    LTVDHVFWEEMRFHPTWITNTLDLYYEKYSYRDQ.....AGLAFTHDMGVADGFS

*Gst43xynB2*    TT    TT    α8    α9    α10

410    420    430    440    450    460

*Gst43xynB2*    RPHYSSYELYGITSGCFSHMTHEQLNWNVLCAAVYIEQTKDWAWRDRRLTILEOCLESMSVR

*GstT6XynB2*    RPHYSSYELYGITSGCFSHMTHEQLNWNVLCAAVYIEQTKDWAWRDRRLTILEOCLESMSVR

*GthXynB2*    RPHYSSYELYGITSGCFSHMTHEQLNWNVLCAAVYIEQTKDWAWRDRRLTILEOCLESMSVR

*Geost1A*    RPHYSSYELYGITSGCFSHMTHEQLNWNVLCAAVYIEQTKDWAWRDRRLTILEOCLESMSVR

*Geost21*    RPHYSSYELYGITSGCFSHMTHEQLNWNVLCAAVYIEQTKDWAWRDRRLTILEOCLESMSVR

*Geost22*    RPHYSSYELYGITSGCFSHMTHEQLNWNVLCAAVYIEQTKDWAWRDRRLTILEOCLESMSVR

*Aercav*    RPHYSSYELYGITSGCFSHMTHEQLNWNVLCAAVYIEQTKDWAWRDRRLTILEOCLESMSVR

*PaedG22*    RPHYSSYELYGITSGCFSHMTHEQLNWNVLCAAVYIEQTKDWAWRDRRLTILEOCLESMSVR

*Halhal*    RPHYSSYELYGITSGCFSHMTHEQLNWNVLCAAVYIEQTKDWAWRDRRLTILEOCLESMSVR

*Thesac*    KEGYSSYELPNLTGCFSYMTHLELNWVLTGSVYAIKINDKEWLNKKNMGVFEDGFDLSLVJA

*Gst43xynB2*    η6    β24    η7    α11    α12

470    480    490    500    510    520

*Gst43xynB2*    RDHPDPEKRRNGVMGLDSTRRTMGGAETITTYDSLDSVSLGOARNNLYLAGKCAWAAVVALEKLF

*GstT6XynB2*    RDHPDPEKRRNGVMGLDSTRRTMGGAETITTYDSLDSVSLGOARNNLYLAGKCAWAAVVALEKLF

*GthXynB2*    RDHPDPEKRRNGVMGLDSTRRTMGGAETITTYDSLDSVSLGOARNNLYLAGKCAWAAVVALEKLF

*Geost1A*    RDHPDPEKRRNGVMGLDSTRRTMGGAETITTYDSLDSVSLGOARNNLYLAGKCAWAAVVALEKLF

*Geost21*    RDHPDPEKRRNGVMGLDSTRRTMGGAETITTYDSLDSVSLGOARNNLYLAGKCAWAAVVALEKLF

*Geost22*    RDHPDPEKRRNGVMGLDSTRRTMGGAETITTYDSLDSVSLGOARNNLYLAGKCAWAAVVALEKLF

*Aercav*    RDHPDPEKRRNGVMGLDSTRRTMGGAETITTYDSLDSVSLGOARNNLYLAGKCAWAAVVALEKLF

*PaedG22*    RDHPDPEKRRNGVMGLDSTRRTMGGAETITTYDSLDSVSLGOARNNLYLAGKCAWAAVVALEKLF

*Halhal*    RDHPDPEKRRNGVMGLDSTRRTMGGAETITTYDSLDSVSLGOARNNLYLAGKCAWAAVVALEKLF

*Thesac*    RDKN...NDGTHMDVDSRCETGSEITTYDSLDESLSGOARNNLYLAGKCAWAAVVALEKLF

*Gst43xynB2*    α13    TT    η8    α14

530    540    550    560    570    580

*Gst43xynB2*    RDVKGKEELAAAREQAQEKCAATIVSHV.TEDGYIPAVMGECDNSKIIPAIIEGLVFPYFTN

*GstT6XynB2*    RDVKGKEELAAAREQAQEKCAATIVSHV.TEDGYIPAVMGECDNSKIIPAIIEGLVFPYFTN

*GthXynB2*    RDVKGKEELAAAREQAQEKCAATIVSHV.TEDGYIPAVMGECDNSKIIPAIIEGLVFPYFTN

*Geost1A*    RDVKGKEELAAAREQAQEKCAATIVSHV.TEDGYIPAVMGECDNSKIIPAIIEGLVFPYFTN

*Geost21*    RDVKGKEELAAAREQAQEKCAATIVSHV.TEDGYIPAVMGECDNSKIIPAIIEGLVFPYFTN

*Geost22*    RDVKGKEELAAAREQAQEKCAATIVSHV.TEDGYIPAVMGECDNSKIIPAIIEGLVFPYFTN

*Aercav*    ATEKLANLSHQAAGLQADRCDAASTIAAQL.TDGGYIPAVIAENNDNSRIIPAIIEGLVFPYFTG

*PaedG22*    KETGCELAEEVAGLQAQRCAADTVSHV.QEDGTIPAVIGEENNSKIIPAIIEGLVFPYFTG

*Halhal*    AEEGLLEELSKAAGEQAERAAKTICGNV.TEGGYIPAVIGEENNSKIIPAIIEGLVFPYFTN

*Thesac*    KENDLSEKAEKALEKARQAANTIVAKFDEENQYIPAVFENGNTSRIIPAVEALVVPYVVG

*Gst43xynB2*    η9    α15    T.T    β25    α16

590    600    610    620    630    640

*Gst43xynB2*    CHEALREDGRFGDYIRALRQHLQYVLRGICLFF.DGGWKTSSTSNNSWLSKIYLCQFIA

*GstT6XynB2*    CHEALREDGRFGDYIRALRQHLQYVLRGICLFF.DGGWKTSSTSNNSWLSKIYLCQFIA

*GthXynB2*    CHEALREDGRFGDYIRALRQHLQYVLRGICLFF.DGGWKTSSTSNNSWLSKIYLCQFIA

*Geost1A*    CHEALREDGRFGDYIRALRQHLQYVLRGICLFF.DGGWKTSSTSNNSWLSKIYLCQFIA

*Geost21*    CHEALREDGRFGDYIRALRQHLQYVLRGICLFF.DGGWKTSSTSNNSWLSKIYLCQFIA

*Geost22*    CHEALREDGRFGDYIRALRQHLQYVLRGICLFF.DGGWKTSSTSNNSWLSKIYLCQFIA

*Aercav*    CEALADVKGRTCPYLKALQTHLKTIVLPCTCLFE.DGGWKTSSTSNNSWLSKIYLCQFIA

*PaedG22*    CREALDADGRFCAYIRALDRHFRFVLRGICLFF.DGGWKTSSTSNNSWLSKIYLCQFIA

*Halhal*    CREALDRNGRFCAYIRALDRHFRFVLRGICLFF.DGGWKTSSTSNNSWLSKIYLCQFIA

*Thesac*    YTDVFSSEDGVFGGLIKALKKHVMTIMKPGICIDEVS.DGGWKTSSTSNNTWNSTKIELCQYVI

*Gst43xynB2*    α17    η10    β26    β27    η11

650    660    670    680    690    700

*Gst43xynB2*    RRILGWEDWEQKGRADAAHVAVLTHPTLSIWSWSDQI..TAGEISGSKYYPRGVTSILWL

*GstT6XynB2*    RRILGWEDWEQKGRADAAHVAVLTHPTLSIWSWSDQI..TAGEISGSKYYPRGVTSILWL

*GthXynB2*    RRILGWEDWEQKGRADAAHVAVLTHPTLSIWSWSDQI..TAGEISGSKYYPRGVTSILWL

*Geost1A*    RRILGWEDWEQKGRADAAHVAVLTHPTLSIWSWSDQI..TAGEISGSKYYPRGVTSILWL

*Geost21*    RRILGWEDWEQKGRADAAHVAVLTHPTLSIWSWSDQI..TAGEISGSKYYPRGVTSILWL

*Geost22*    RRILGWEDWEQKGRADAAHVAVLTHPTLSIWSWSDQI..TAGEISGSKYYPRGVTSILWL

*Aercav*    RELLDVWEDETGAADAAHVAVLTHPTLSIWSWSDQI..LSGVAVGSKYYPRGVTSILWL

*PaedG22*    RRILGLPWDEKGAADAAHVAVLTHPTLSIWSWSDQI..TSGEIAGSKYYPRGVTSILWL

*Halhal*    RHIIGLPWDEKGAADAAHVAVLTHPTLSIWSWSDQI..TSGEIAGSKYYPRGVTSILWL

*Thesac*    KDVNLNIDFGDKETIWDKVHAMWQVSC.SEDCATDQVNSDTGTPRSRLYPRVTSVVLWM

*Gst43xynB2*    α18

710

*Gst43xynB2*    EEEHHHHHHH.....

*GstT6XynB2*    EEEHHHHHHH.....

*GthXynB2*    EEEHHHHHHH.....

*Geost1A*    EEEHHHHHHH.....

*Geost21*    EEEHHHHHHH.....

*Geost22*    EEEHHHHHHH.....

*Aercav*    LEGKGNRLTQIYASKEAVQ.....

*PaedG22*    .....

*Halhal*    EET.....

*Thesac*    K.....

Figure S2. Sequence alignment of  $\beta$ -xylosidases of contrasted activity available at the CAZY database ([http://www.cazy.org/GH52\\_characterized.html](http://www.cazy.org/GH52_characterized.html), accessed November, the 8<sup>th</sup>, 2023). Gst43XynB2, *Geobacillus stearothermophilus* CECT43, Genbank acc. No. WOK24302; GstT6XynB2, *Geobacillus stearothermophilus* T-6 NCIMB 40222, Uniprot Q09LZ0; GthXynB2, *Parageobacillus thermoglucosidasius* NBRC 107763 / TM242, Uniprot A0A067XG64; Geost1A, *Geobacillus stearothermophilus* 1A05583. Uniprot M1GNL7; Geost21, *Geobacillus stearothermophilus* 21, Uniprot P45702; Geost22, *Geobacillus stearothermophilus* 21, Genbank acc. No. KFL17027.1; Aercav, *Aeromonas caviae* ME-1, Uniprot Q9Z487; PaeDG22, *Paenibacillus* sp. DG-22, Uniprot B6C867; Halhal, *Halalkalibacterium halodurans* C-125, Uniprot Q9KB21; Thesac, *Thermoanaerobacterium saccharolyticum* strain DSM 8691, Uniprot I3VVB3. Residues conserved in the interface of Gst43XynB2 are marked with asterisks (\*).

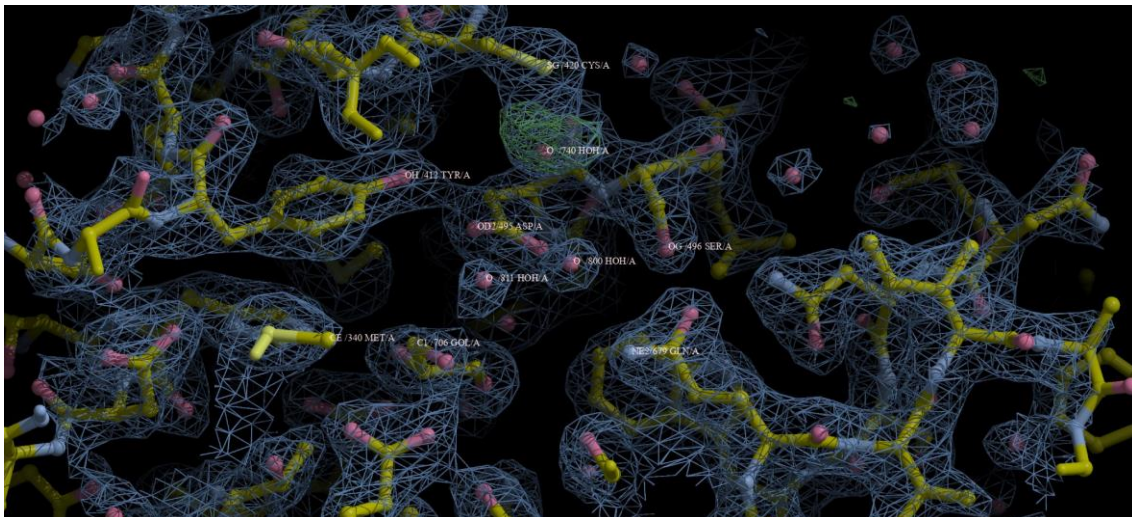

Figure S3. Electron densities in the Gst43XynB2 +1 site contoured at 1.09  $\sigma$ . Modification of Cys420 by radiation damage is compatible with extra densities observed for this residue.



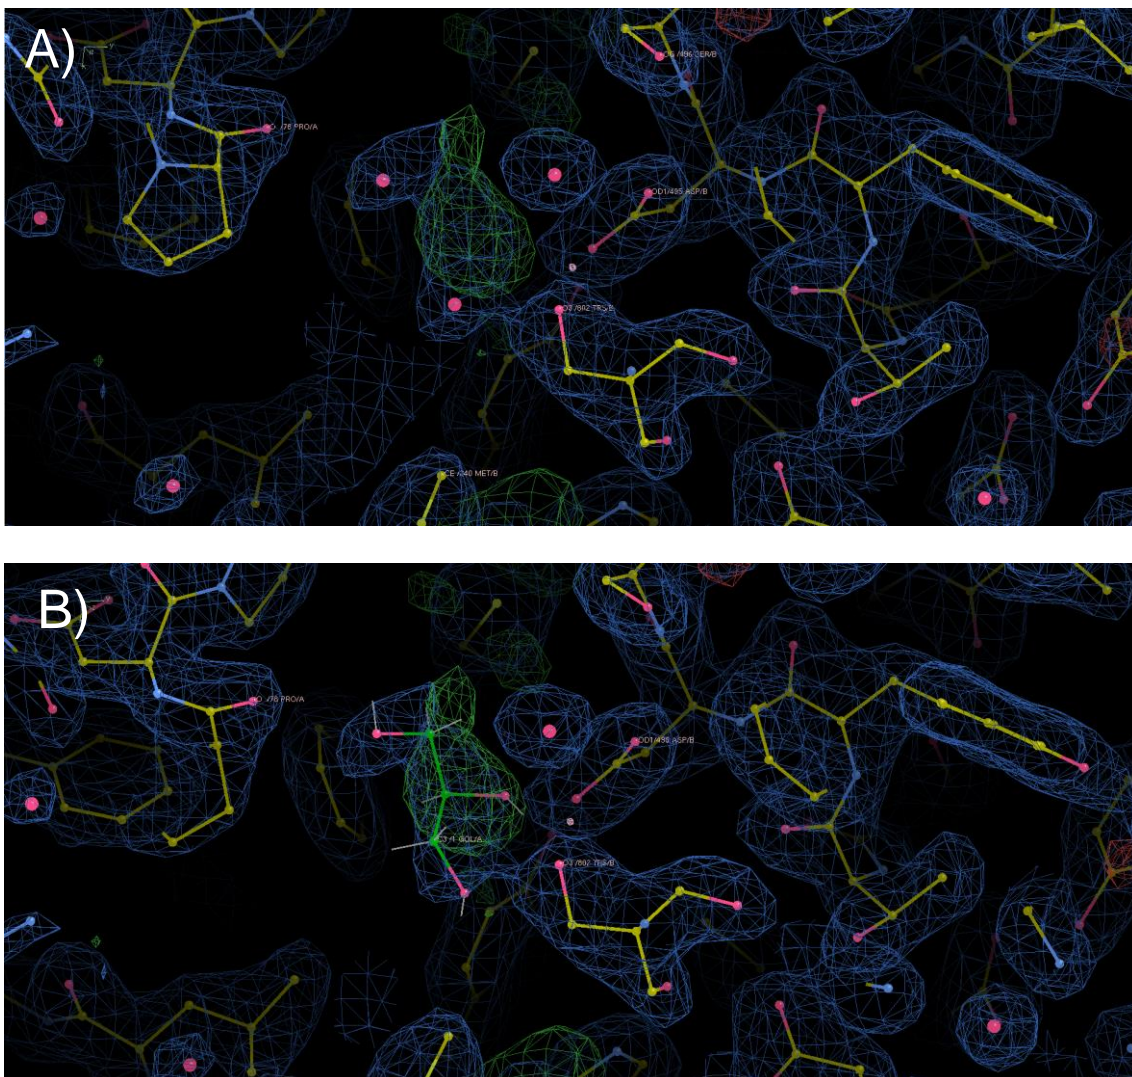

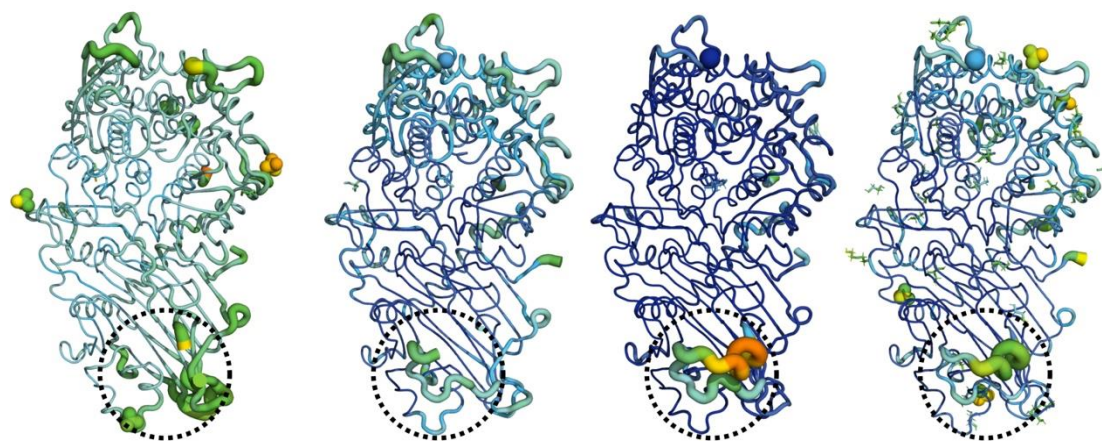

Figure S5. Representation in putty mode of the different *Geobacillus* XynB2 structures (from left to right, PDBs 4C1O, 4C1P, 4RHH and 8QME). The structures are coloured according to their B-factors. The position of the loop closing the catalytic centre (containing Pro100<sup>GthXynB2</sup> / Pro78<sup>Gst43XynB2</sup>) is highlighted.



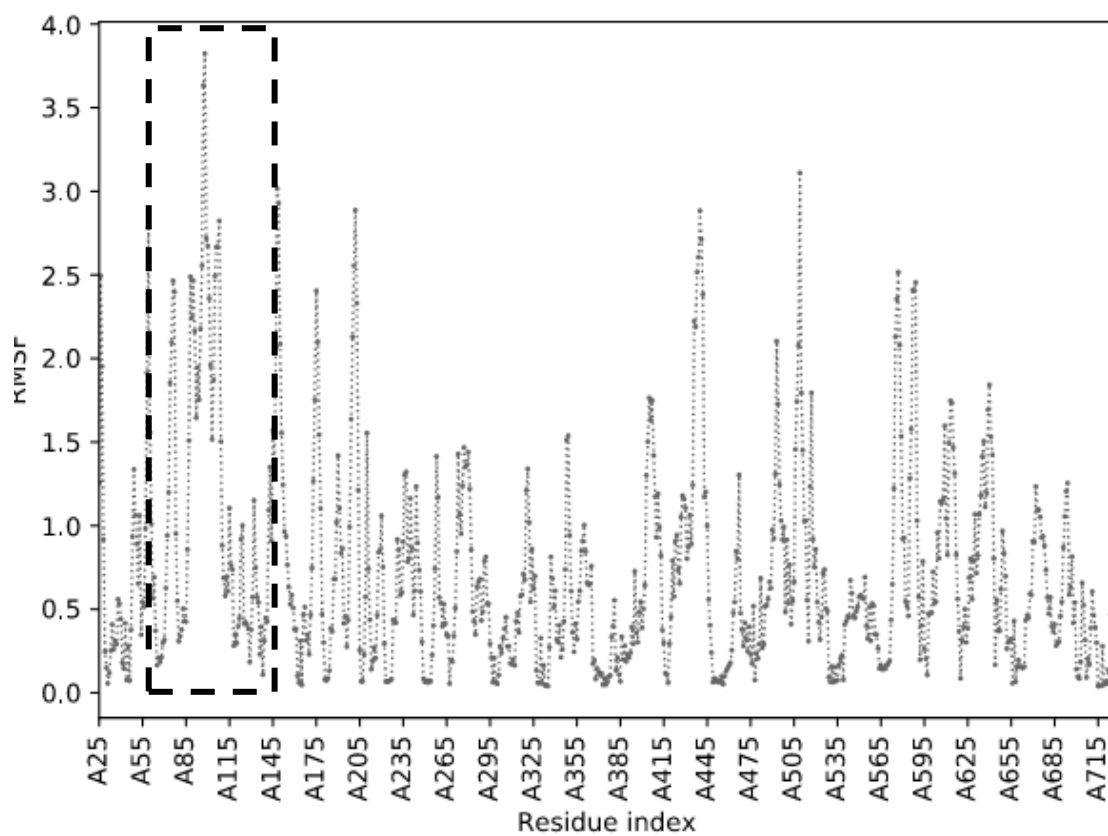

Figure S6. Fluctuation map obtained with the CABS-flex 2.0 server using the GthXynB2 structure as input (PDB 4C1O). The loop containing Pro100<sup>GthXynB2</sup> (Pro78<sup>Gst43XynB2</sup>) is highlighted.

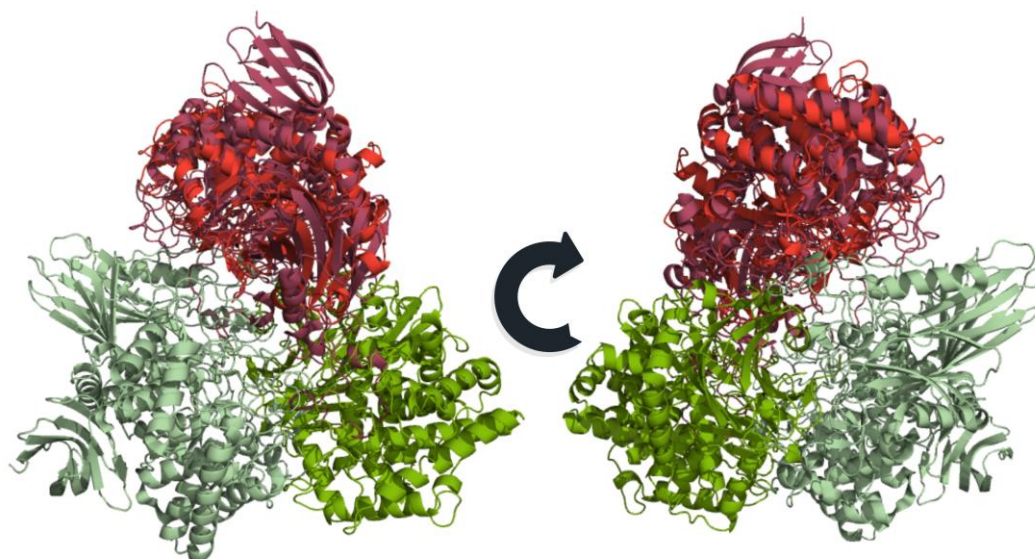

Figure S7. Different dimerization interfaces found in the GH52 and the GH116 families, using Gst43XynB2 (PDB 8QME) and ExoMA2 (PDB 8IC6) dimers as representatives. Both dimers were superposed using chain A (in red). As it is shown, the second protomer of each dimer (in different green colors) does not occupy the same position, being roughly rotated 100°.

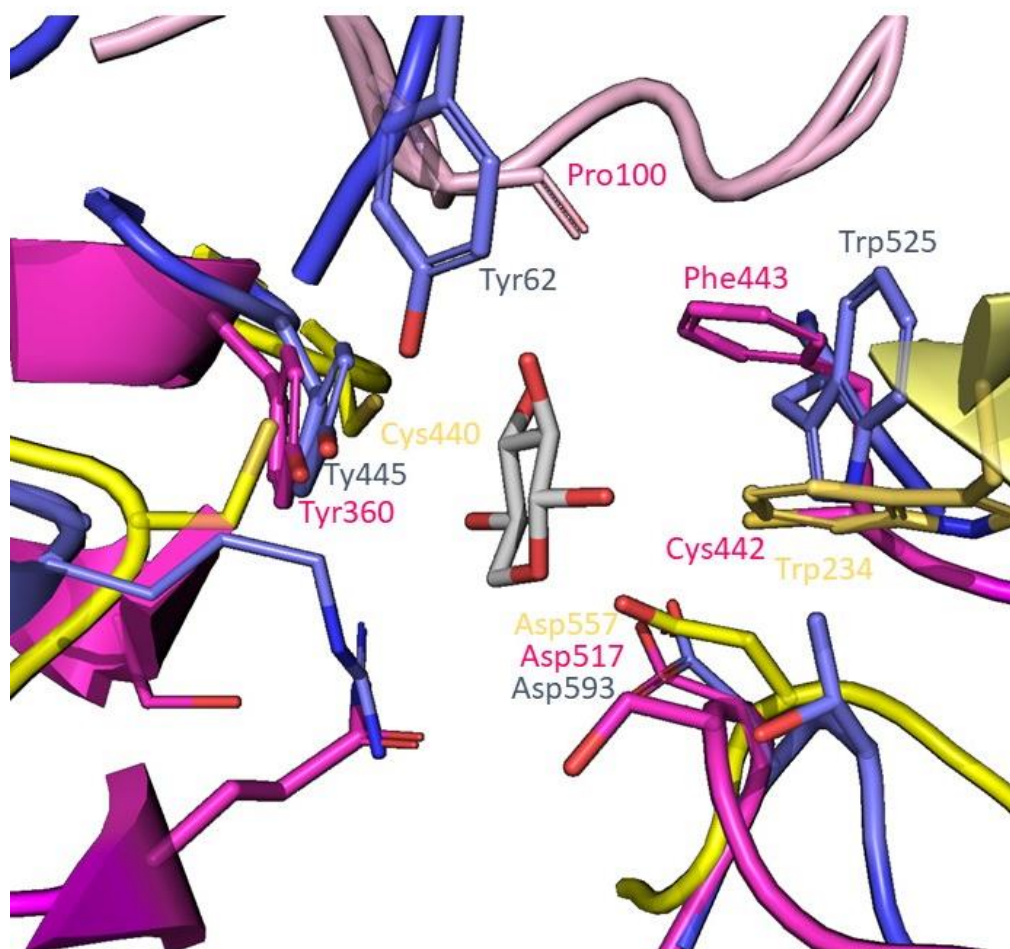

Figure S8. Superposition of the +1 binding site of GthXynB2 (PDB 4C1P, pink tones), TxGH116 (PDB 5BX5, blue tones) and ExoMA2 (PDB 8IC7, yellow tones). Xylose from PDB 4C1P, occupying the +1 site, is shown in white tones.



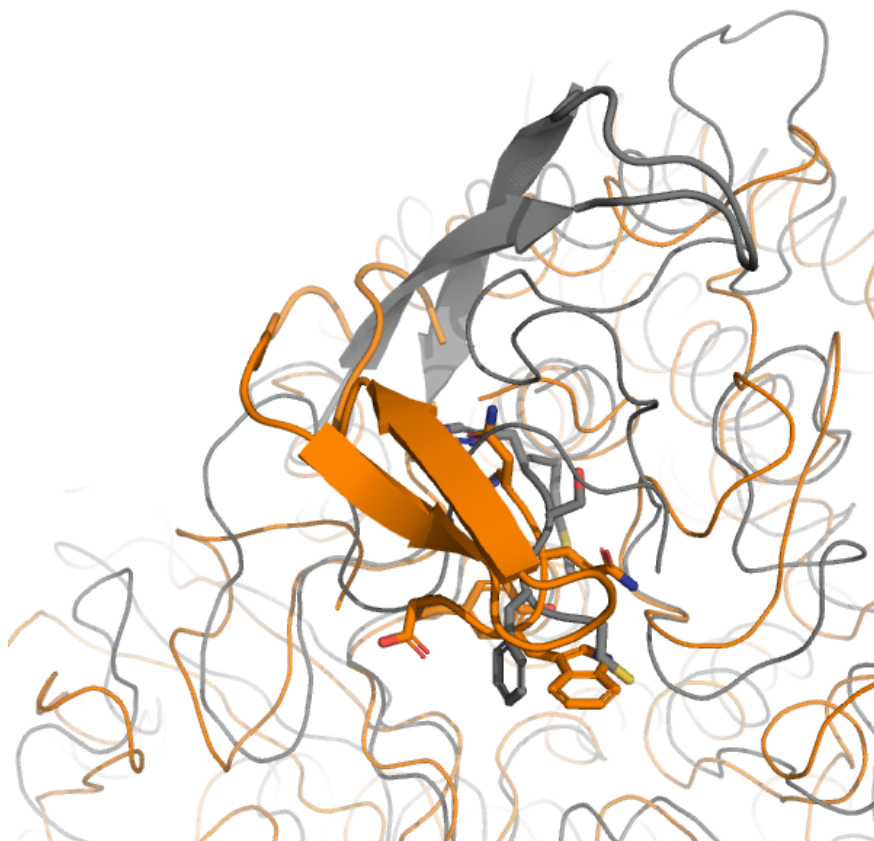

Figure S9. Common  $\beta$ -hairpin appearing in TxGH116 (PDB 5BX5, orange) and Gst43XynB2 (PDB 8QME, gray) which are totally displaced between the two structures (residues 480-504<sup>TxGH116</sup>/373-395<sup>Gst43XynB2</sup>).

|                       | <b>GthXyn</b>               | <b>GthXynB</b>              | <b>GstT6XynB2</b>         | <b>Gst43XynB2</b>         |
|-----------------------|-----------------------------|-----------------------------|---------------------------|---------------------------|
| <b>PDB ID</b>         | <b>4C1P</b>                 | <b>4C1O</b>                 | <b>4RHH</b>               | <b>8QME</b>               |
| <b>Resolution (Å)</b> | 2.63                        | 1.70                        | 2.15                      | 2.25                      |
| Ligand -1 subsite     | xylobiose                   | Glycerol                    | Tris                      | Glycerol                  |
|                       | Glu357                      | Glu357                      | Gly335 <sup>c,d</sup>     | <b>Glu335<sup>a</sup></b> |
|                       | Tyr360                      | Tyr360                      | Tyr338 <sup>c</sup>       | Tyr338 <sup>c</sup>       |
|                       | Met362                      | Met362                      | Met340 <sup>c</sup>       | Met340 <sup>c</sup>       |
|                       | Thr365                      | Thr365                      | Thr343                    | Thr343                    |
|                       | Asp367                      | Asp367                      | <b>Asp345<sup>a</sup></b> | <b>Asp345<sup>a</sup></b> |
|                       | Leu368                      | Leu368                      | Leu346 <sup>c</sup>       | Leu346 <sup>c</sup>       |
|                       | <b>His418<sup>a</sup></b>   | <b>His418<sup>a</sup></b>   | <b>His396<sup>a</sup></b> | <b>His396<sup>a</sup></b> |
|                       | Tyr434                      | Tyr434                      | Tyr412 <sup>c</sup>       | Tyr412 <sup>c</sup>       |
|                       | Met446                      | Met446                      | Met424                    | Met424                    |
|                       | <b>Thr515<sup>a</sup></b>   | <b>Thr515<sup>a</sup></b>   | <b>Thr493<sup>a</sup></b> | <b>Thr493<sup>a</sup></b> |
|                       | Tyr516 <sup>c</sup>         | Tyr516                      | Tyr494 <sup>c</sup>       | Tyr494 <sup>c</sup>       |
|                       | Asp 517                     | Asp 517                     | <b>Asp495<sup>a</sup></b> | Asp495                    |
|                       | Trp654                      | Trp654                      | Trp632                    | Trp632                    |
|                       | Gln701                      | Gln701 <sup>c</sup>         | Gln679                    | Gln679 <sup>c</sup>       |
|                       | Ser710                      | Ser710                      | <b>Ser688<sup>a</sup></b> | Ser688 <sup>c</sup>       |
|                       | Tyr713                      | Tyr713                      | <b>Try691<sup>a</sup></b> | Try691 <sup>c</sup>       |
|                       | <b>Arg715<sup>a</sup></b>   | <b>Arg715<sup>a</sup></b>   | <b>Arg693<sup>a</sup></b> | <b>Arg693<sup>a</sup></b> |
| Ligand +1 subsite     | xylobiose                   | Glycerol                    | None                      | None                      |
| Residues              | <b>Pro100<sup>a,b</sup></b> | <b>Pro100<sup>a,b</sup></b> | Pro78*                    | Pro78 <sup>c</sup>        |
|                       | Pro102 <sup>b</sup>         | Pro102 <sup>b</sup>         | Pro80 <sup>c</sup>        | Pro80 <sup>c</sup>        |
|                       | <b>Tyr360<sup>d</sup></b>   | Tyr360                      | Tyr338 <sup>c</sup>       | Tyr338 <sup>c</sup>       |
|                       | Met362                      | Met362 <sup>c</sup>         | Met340 <sup>c</sup>       | Met340 <sup>c</sup>       |
|                       | Tyr434                      | Tyr434                      | Tyr412 <sup>c</sup>       | Tyr412 <sup>c</sup>       |
|                       | Cys442                      | Cys442                      | Cys420 <sup>c</sup>       | Cys420 <sup>c</sup>       |
|                       | Phe443                      | Phe443                      | Phe421 <sup>c</sup>       | Phe421 <sup>c</sup>       |
|                       | Asp517                      | <b>Asp517<sup>a</sup></b>   | Asp495 <sup>c</sup>       | Asp495 <sup>c</sup>       |
|                       | Ser518                      | Ser518                      | Ser496 <sup>c</sup>       | Ser496 <sup>c</sup>       |
|                       | Trp654 <sup>c</sup>         | Trp654                      | Trp632 <sup>c</sup>       | Trp632 <sup>c</sup>       |
|                       | <b>Gln701<sup>a</sup></b>   | <b>Gln701<sup>a</sup></b>   | Gln679 <sup>c</sup>       | Gln679 <sup>c</sup>       |
|                       | Ser710                      | Ser710 <sup>c</sup>         | Ser688 <sup>c</sup>       | Ser688 <sup>c</sup>       |
|                       |                             |                             |                           |                           |

Table S1. Correspondence of residues in the different *Geobacillus* XynB2 structures with any atom at less than 4Å from ligands found in binding subsites +1 and -1. <sup>a</sup>Direct polar contacts calculated by Pymol, also highlighted in bold. <sup>b</sup>Residues belonging to a second protomer. <sup>c</sup>Counterpart residues which do not appear or appear at more than 4Å from a ligand in the corresponding structure. <sup>d</sup>This structure is a E335G active-site mutant.
